# Supplementary material
Source: publisher figshare collection journal article supplement (https://acs.figshare.com/ndownloader/files/4413997)
Supplement: Supplementary file 1 [file 4413997]

## Supporting Information

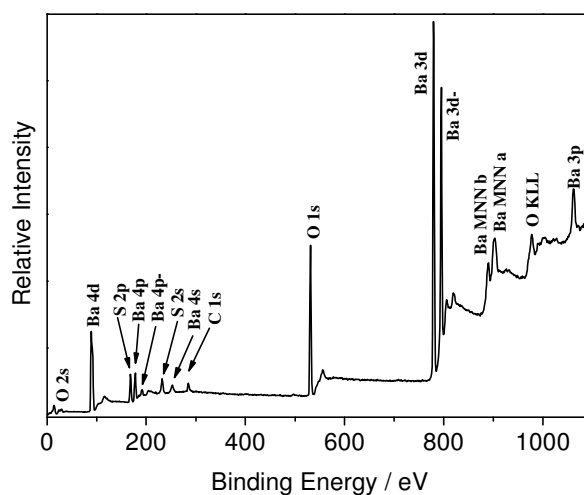

**Figure SI-1.** X-ray photoelectron spectrum of the sample synthesized at the irradiation time of 1000 min. The dose rate is 20 Gy/min, and the concentration of EDTA is 8 mmol/L.

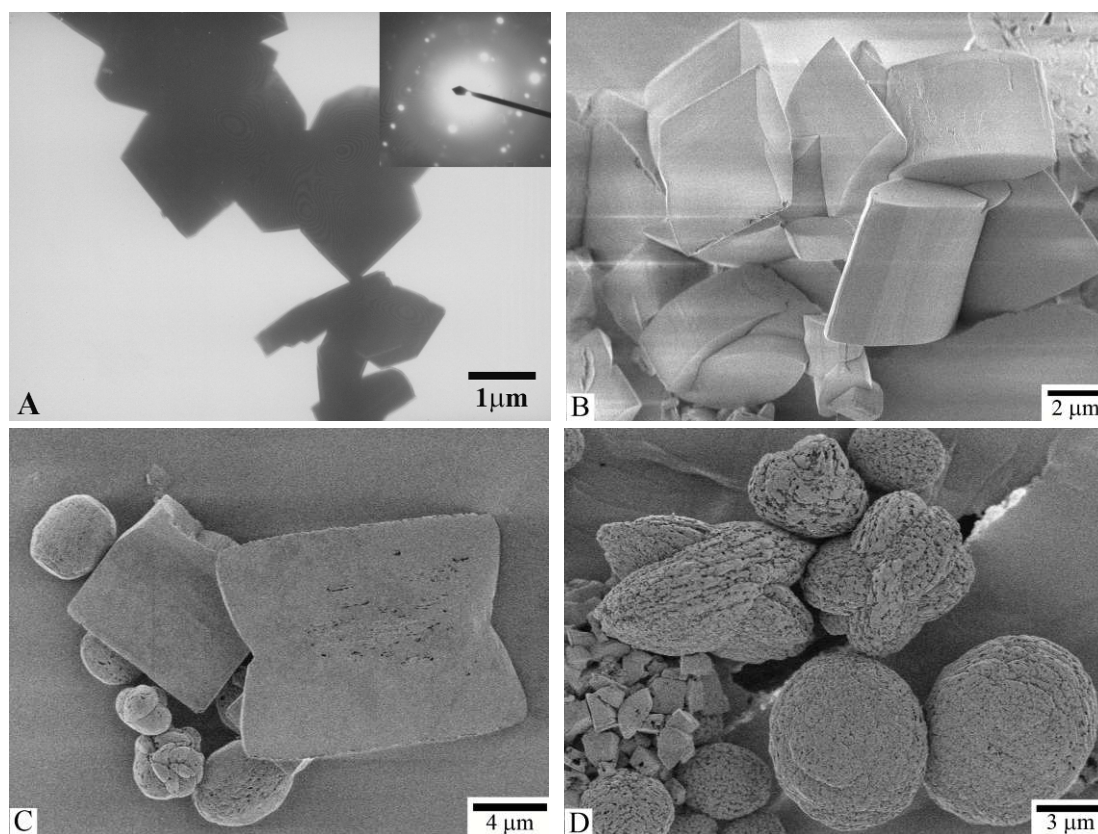

**Figure SI-2.** TEM (A) and SEM (B–D) images of the samples synthesized in EDTA solution with different concentrations (from A to D, [EDTA] = 0, 0, 0.08, 0.8 mmol/L). The irradiation time and the dose rate are fixed at 1000 min and 20 Gy/min, respectively.

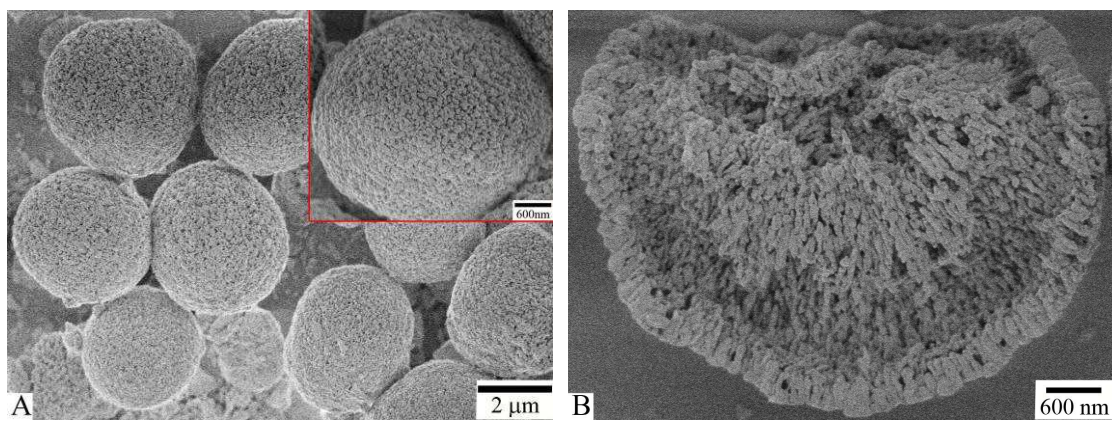

**Figure SI-3.** SEM images of the samples (irradiation time: 250 min) ripened in the irradiated mother solution for 24 h.
